# Supplementary material
Source: publisher site journal article supplement (https://www.dovepress.com/article/379356)
Supplement: Supplementary file 1 [file get_supplementary_file.php]

**
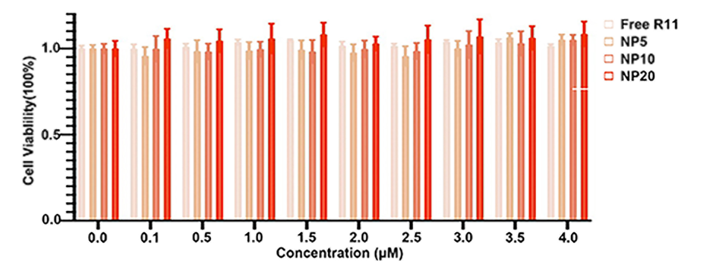
**

**Supplementary Figure 1** Viability of cells after treatment with different concentrations of nanocomplexes at different NP ratios.

**Abbreviations:** NP, nitrogen-to-phosphate; R11, hendeca-arginine peptide.
